# Supplementary material
Source: Springer Nature journal article supplement (https://www.springermedizin.de/resource/supplementary/12943_2013_1331_MOESM1_ESM.pdf/9552732)
Supplement: MOESM1 [file 9552732]

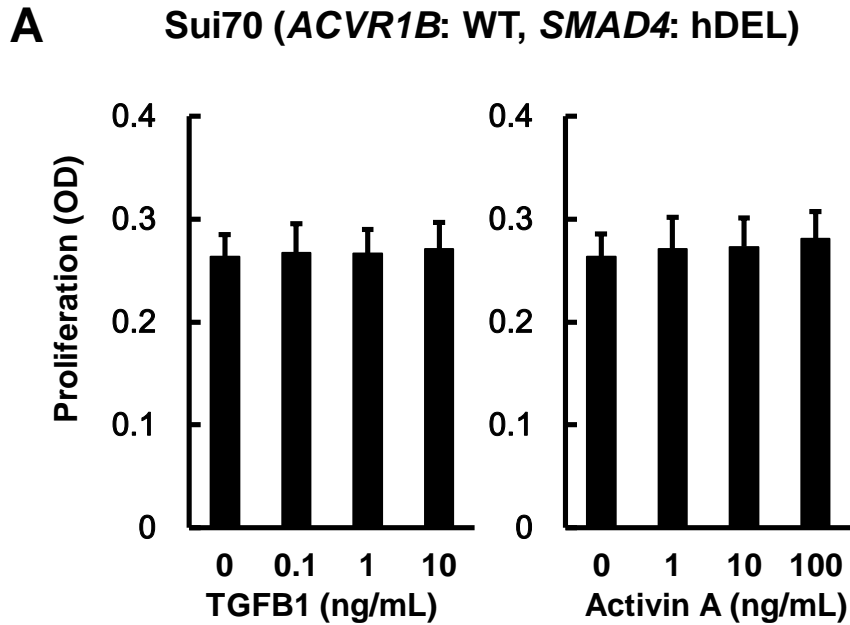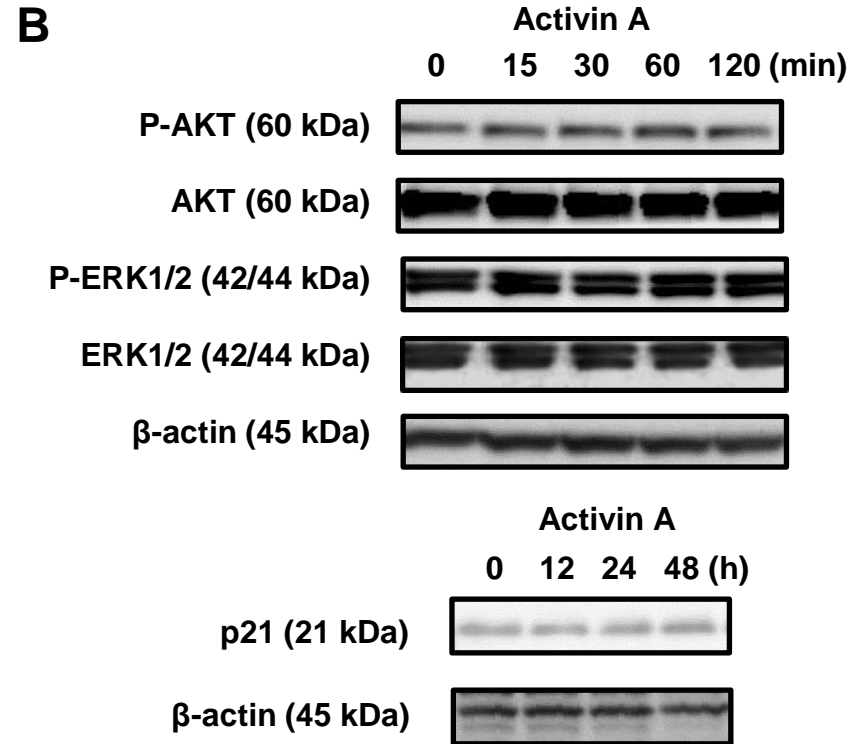

Effects of ligands on the Sui70 cell line (wild-type *ACVR1B* gene and homozygous deletion of *SMAD4* gene). A. Influence of TGFβ1 and activin A on cellular growth in the Sui70 cell line. Both TGFβ1 (0.1 ng/mL,  $P = 0.42$ ; 1 ng/mL,  $P = 0.65$ ; 10 ng/mL,  $P = 0.30$ ) and activin A (1 ng/mL,  $P = 0.38$ ; 10 ng/mL,  $P = 0.47$ ; 100 ng/mL,  $P = 0.35$ ) did not influence the cellular growth. hDEL, homozygous deletion; WT, wild-type. B. Western blot analyses for non-SMAD pathway and p21. Both AKT and ERK1/2 had already been phosphorylated, and the phosphorylation was not enhanced by activin A. The expression of p21 was not changed by activin A.
